# Supplementary material
Source: Springer Nature journal article supplement (https://www.springermedizin.de/resource/supplementary/12957_2010_718_MOESM4_ESM.pdf/9565586)

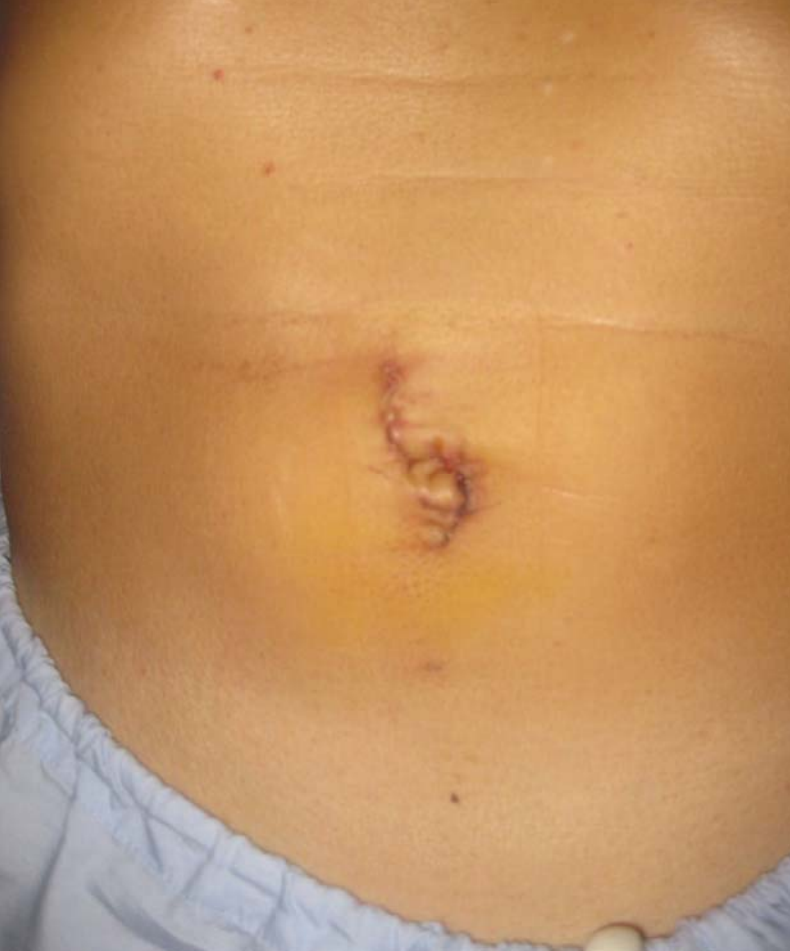

Supplement: MOESM4 [file 9565586]
